# Supplementary material for: Fabrication and Characterization of Novel Silk Fiber-Optic SERS Sensor with Uniform Assembly of Gold Nanoparticles
Source: Sensors (Basel). 2022 Nov 21;22(22):9012. doi: 10.3390/s22229012 (PMC9692301; doi:10.3390/s22229012)
Supplement: Supplementary file 1 [file sensors-22-09012-s001.zip › sensors-1989278-supplementary.pdf]

Supplementary Information S1: Detailed explanation of the EF calculation.

We describe how to calculate the enhancement factor (EF).

$$EF = \frac{I_{SERS}/N_{SERS}}{I_{BULK}/N_{BULK}}$$

$I_{SERS}$  = 7415 for the silk fiber and 9337 for the silica fiber

$I_{BULK}$  = 10,095 for the 4-ABT power

$$N_{SERS} = \frac{\text{Total surface area of gold nanoparticles in laser spot size}}{\text{Size of target molecule}} = 35.55 \times 10^9$$

$$N_{BULK} = \frac{D_{molecule} \times \text{Laser spot size} \times \text{Penetration depth}}{MW_{molecule}} \times 6.022 \times 10^{23} = 89.16 \times 10^{13}$$

Table S1. Calculation parameters

|                                               |                        |
|-----------------------------------------------|------------------------|
| Diameter of laser                             | 100 $\mu\text{m}$      |
| Penetration depth                             | 20 $\mu\text{m}$       |
| Density of 4-ABT ( $D_{molecule}$ )           | 1.18 g/cm <sup>3</sup> |
| Molecular weight of 4-ABT ( $MW_{molecule}$ ) | 125.19 g/mol           |
| Size of 4-ABT                                 | 0.2 nm <sup>2</sup>    |
| Total surface area of gold nanoparticles      | 7.11 m <sup>2</sup>    |

$$EF (\text{silk fiber}) = \frac{I_{SERS}}{N_{SERS}} \times \frac{N_{BULK}}{I_{BULK}} = 1.84 \times 10^4$$

$$EF (\text{silica fiber}) = \frac{I_{SERS}}{N_{SERS}} \times \frac{N_{BULK}}{I_{BULK}} = 2.31 \times 10^4$$
